# Supplementary material for: Heterofunctional epoxy support development for immobilization of fructosyltransferase from Pectinex® Ultra SP-L: batch and continuous production of fructo-oligosaccharides
Source: Royal Society of Chemistry journal article supplement (doi:10.1039/d2re00182a), 2022-01-01

1 **Supporting Information**

2

3 **Heterofunctional epoxy support development for immobilization of fructosyltransferase**  
4 **from Pectinex® Ultra SP-L: batch and continuous production of fructo-oligosaccharides**

5 Milica Veljković <sup>a</sup>, Milica Simović <sup>b,1</sup>, Katarina Banjanac <sup>a</sup>, Marija Čorović <sup>b</sup>, Ana Milivojević <sup>a</sup>

6 Milan Milivojević <sup>c</sup>, Dejan Bezbradica <sup>b</sup>

7

8 <sup>a</sup> *Innovation center of Faculty of Technology and Metallurgy, University of Belgrade, Karnegijeva 4,*  
9 *11000 Belgrade, Serbia*

10 <sup>b</sup> *Department of Biochemical Engineering and Biotechnology, Faculty of Technology and Metallurgy,*  
11 *University of Belgrade, Karnegijeva 4, 11000 Belgrade, Serbia*

12 <sup>c</sup> *Department of Chemical Engineering, Faculty of Technology and Metallurgy, University of Belgrade,*  
13 *Karnegijeva 4, 11000 Belgrade, Serbia*

---

<sup>1</sup> Corresponding author: Milica Simović, Faculty of Technology and Metallurgy, University of Belgrade, Karnegijeva 4, 11000 Belgrade, Serbia. E-mail address: [mcarevic@tmf.bg.ac.rs](mailto:mcarevic@tmf.bg.ac.rs). Tel.: (+38111)3303727. Fax: (+38111)3370387.

**Fig. S1** Thermal stability of immobilized FTase on Purolite® A109 at 55 °C

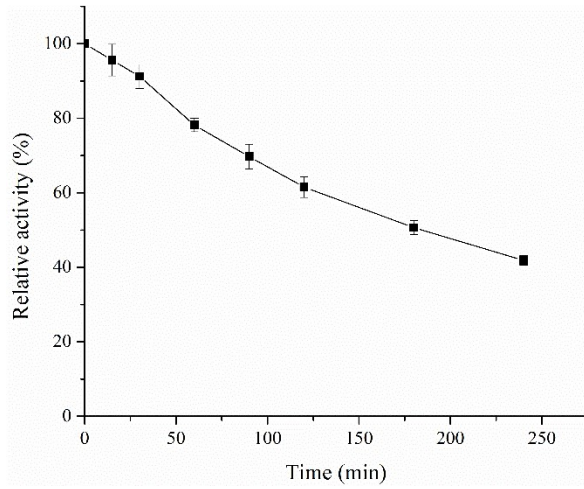

**Fig. S2** Determination of inactivation rate of: (a) soluble, (b) immobilized FTase on epoxy-Purolite and (c) immobilized FTase on Purolite® A109 at different temperatures.

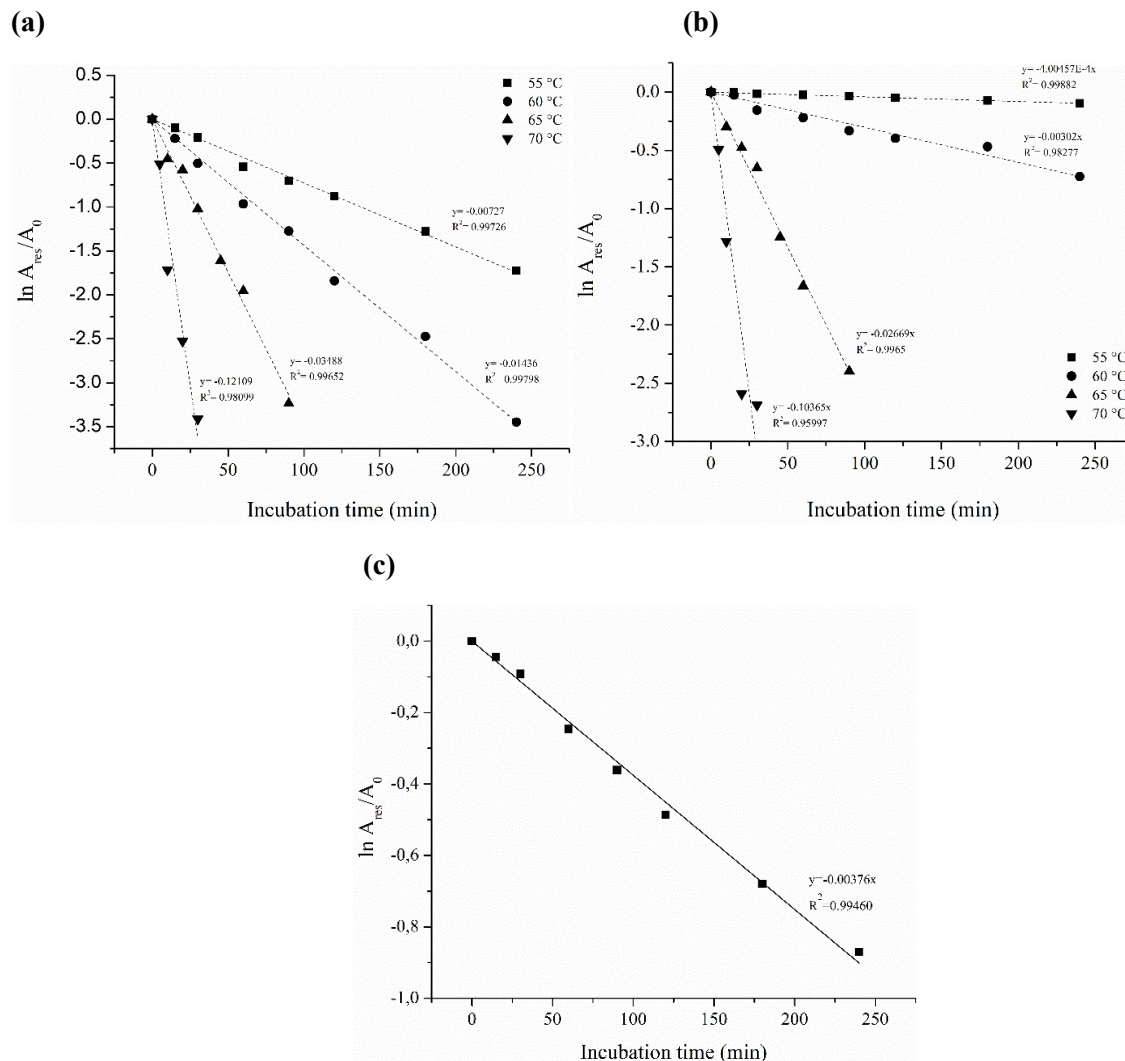

**Fig. S3** Determination of Ed for soluble and immobilized FTase

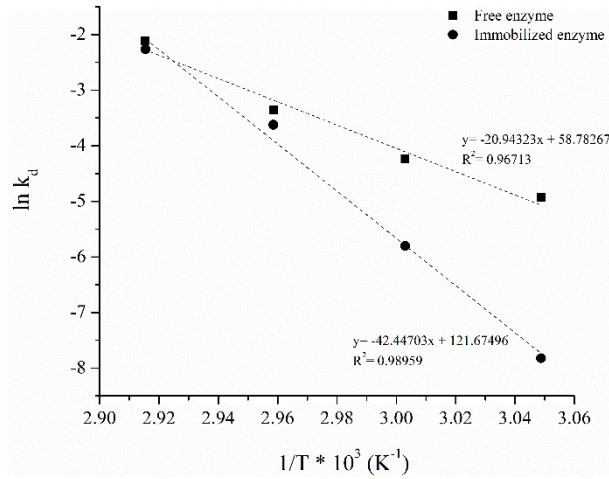

**Fig. S4** SDS-PAGE electrophoresis: **Line 1** Protein ladder, **Line 2** Commercial enzyme preparation Pectinex® Ultra SP-L (2 subunits each 65kDa – FTase<sup>1</sup>, predominant pectinase - endo-PG 38 kDa<sup>2</sup>), **Line 3** Immobilized enzyme preparation on Purolite® A109 (non-modified support), **Line 4** Immobilized enzyme preparation on epoxy-Purolite (modified support), **Line 5** Supernatant after adsorption step in case of epoxy-Purolite, **Line 6** Supernatant after adsorption in case of Purolite® A109, **Line 7** Supernatant after desorption of proteins from epoxy-Purolite, **Line 8** Supernatant after desorption of proteins from Purolite® A109.

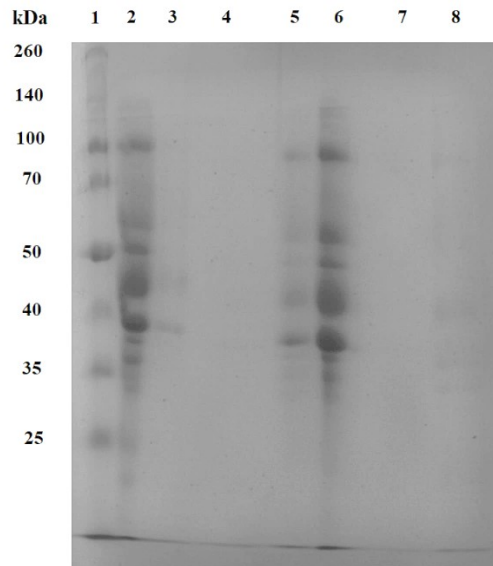

Supplement: d2re00182a1.pdf [file d2re00182a1.pdf]
